# Supplementary material
Source: publisher figshare collection journal article supplement (https://acs.figshare.com/ndownloader/files/10430850)
Supplement: Supplementary file 1 [file 10430850]

# Biobased Anethole/Polyacrylate Cross-linked Materials with Good Transparency and High Thermostability

*Fengkai He, Kaikai Jin, Jing Sun\* and Qiang Fang\**

Key Laboratory of Synthetic and Self-Assembly Chemistry for Organic Functional Molecules,  
Center for Excellence in Molecular Synthesis, Shanghai Institute of Organic Chemistry,  
University of Chinese Academy of Sciences, Chinese Academy of Sciences, 345 Lingling  
Road, Shanghai 200032, PR China.

\* E-mail: qiangfang@sioc.ac.cn.

Page 2.

<sup>1</sup>H NMR, <sup>13</sup>C NMR data and detailed test data of hardness.

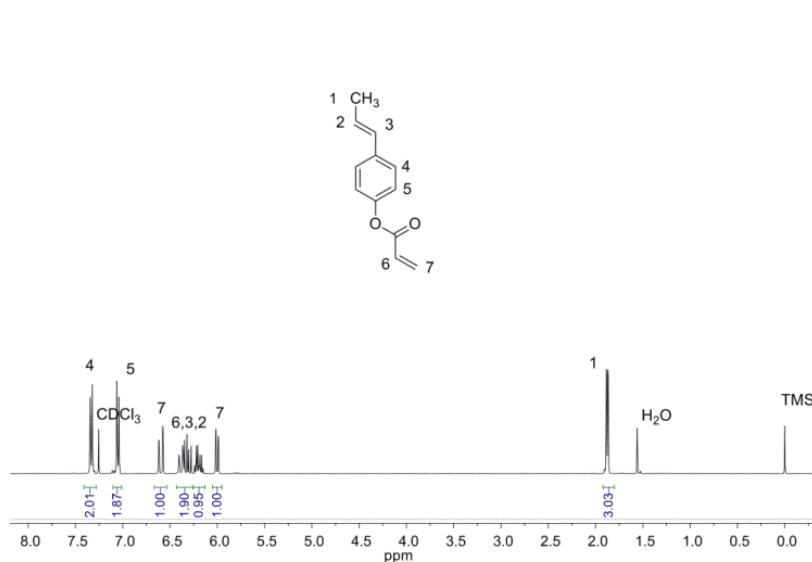

**Figure 1.**  $^1\text{H}$  NMR spectrum of **M2** (400 MHz,  $\text{CDCl}_3$ ).

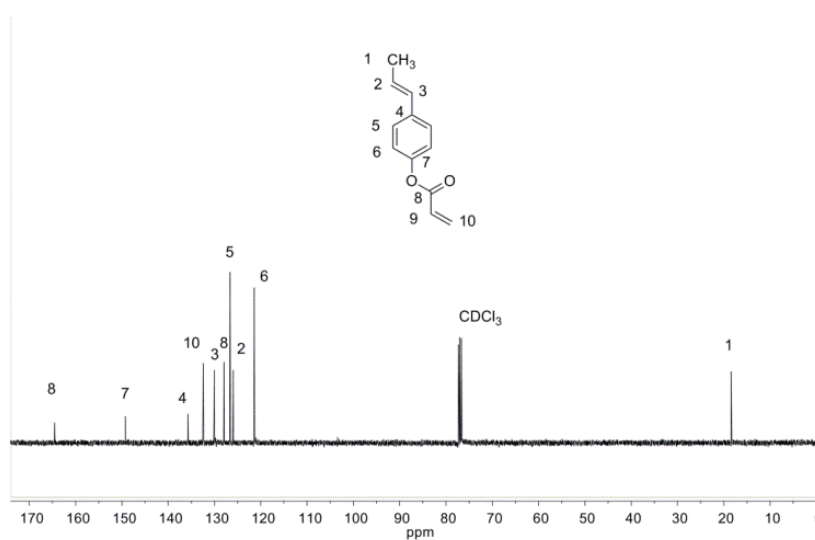

**Figure 2.**  $^{13}\text{C}$  NMR spectrum of **M2** (126 MHz,  $\text{CDCl}_3$ ).

**Table S1.** Detailed test data of hardness.

| Samples  | PMA               | poly(MA-co-M2) <sub>8/1</sub> | poly(MA-co-M2) <sub>4/1</sub> | poly(MA-co-M2) <sub>2/1</sub> | PM2                |
|----------|-------------------|-------------------------------|-------------------------------|-------------------------------|--------------------|
| Hardness | 54 <sup>[a]</sup> | 114 <sup>[b]</sup>            | 117 <sup>[b]</sup>            | 121 <sup>[b]</sup>            | 123 <sup>[b]</sup> |

[a] test data of hardness from a shore hardness tester. [b] test data of hardness from a Rockwell hardness tester.
